# Supplementary material for: The Readiness of Primary Healthcare Facilities to Address Noncommunicable Diseases in Rural Bangladesh
Source: Research Square preprint supplement (doi:10.21203/rs.3.rs-7977902/v1), 2025-11-12
Supplement: Supplementary file 1 [file 710cdfdfa19ae3d8ff6b4cd6.docx]

**Supplementary Table 1: General NCD service readiness index score by facility type**

| **Indicators** | **Upazila Health Complex** | **Union-level public facilities** | **Community Clinic** | **Private/NGO facility** | **Total** |
| --- | --- | --- | --- | --- | --- |
| **n=3** | **n=42** | **n=108** | **n=26** | **n=179** |
| **n (%)** | **n (%)** | **n (%)** | **n (%)** | **n (%)** |
| **Basic amenities** |  |  |  |  |  |
| Water Source | 3  (100.0) | 37  (88.1) | 81  (75.0) | 26  (100.0) | 147  (82.1) |
| Electricity from any source | 3  (100.0) | 42  (100.0) | 107  (99.1) | 26  (100.0) | 178  (99.4) |
| Functioning cellular phone | 3  (100.0) | 13  (31.0) | 7  (6.5) | 25  (96.2) | 48  (26.8) |
| Functional toilet for patient | 3  (100.0) | 29  (69.0) | 39  (36.1) | 25  (96.2) | 96  (53.6) |
| Functioning motorized vehicle to transfer patient | 3  (100.0) | 0  (0.0) | 0  (0.0) | 2  (7.7) | 5  (2.8) |
| Functioning computer/laptop | 3  (100.0) | 5  (11.9) | 72  (66.7) | 22  (84.6) | 102  (57.0) |
| Functioning tablet computer | 3  (100.0) | 25  (59.5) | 57  (52.8) | 4  (15.4) | 89  (49.7) |
| Internet or email within the facility today | 3  (100.0) | 25  (59.5) | 94  (87.0) | 20  (76.9) | 142  (79.3) |
| Room with auditory and visual privacy | 3  (100.0) | 15  (35.7) | 16  (14.8) | 20  (76.9) | 54  (30.2) |
| **Mean (± SD)** | 100.0  (0.0) | 50.5  (33.6) | 48.7  (36.2) | 72.6  (35.8) | 53.4 (30.5) |
| **Basic equipment** |  |  |  |  |  |
| Adult weighing scale | 3  (100.0) | 34  (81.0) | 81  (75.0) | 24  (92.3) | 142  (79.3) |
| Blood pressure apparatus | 3  (100.0) | 37  (88.1) | 97  (89.8) | 24  (92.3) | 161  (89.9) |
| Stethoscope | 3  (100.0) | 38  (90.5) | 86  (79.6) | 24  (92.3) | 151  (84.4) |
| Height board/stadiometer | 1  (33.3) | 21  (50.0) | 70  (64.8) | 7  (26.9) | 99  (55.6) |
| Glucometer | 3  (100.0) | 20  (47.6) | 54  (50.0) | 12  (46.2) | 89  (49.7) |
| Blood glucose test strips | 3  (100.0) | 19  (45.2) | 44  (40.7) | 12  (46.2) | 78  (43.6) |
| Measuring tape | 2  (66.7) | 20  (47.6) | 65  (60.2) | 8  (30.8) | 95  (53.1) |
| **Mean (± SD)** | 85.7  (26.2) | 64.3  (21.0) | 65.7  (17.1) | 61.0  (30.2) | 65.0 (18.8) |
| **Diagnostic facility** |  |  |  |  |  |
| Random blood glucose | 3  (100.0) | 20  (47.6) | 52  (48.1) | 24  (92.3) | 99  (55.3) |
| Fasting blood glucose | 3  (100.0) | 3  (7.1) | 8  (7.4) | 23  (88.5) | 37  (20.7) |
| Urine protein test | 2  (66.7) | 9  (21.4) | 0  (0.0) | 21  (80.8) | 32  (17.9) |
| Urine ketones test | 0  (0.0) | 0  (0.0) | 0  (0.0) | 1  (3.8) | 1  (0.6) |
| Urine glucose test | 3  (100.0) | 3  (7.1) | 0  (0.0) | 23  (88.5) | 29  (16.2) |
| Serum creatinine | 1  (33.3) | 0  (0.0) | 0  (0.0) | 21  (80.8) | 22  (12.3) |
| Serum Electrolyte | 0  (0.0) | 0  (0.0) | 0  (0.0) | 3  (11.5) | 3  (1.7) |
| Total cholesterol | 1  (33.3) | 0  (0.0) | 0  (0.0) | 15  (57.7) | 16  (8.9) |
| Electrocardiogram (ECG) | 3  (100.0) | 0  (0.0) | 0  (0.0) | 20  (76.9) | 23  (12.8) |
| **Mean (± SD)** | 59.3  (43.4) | 9.3  (16.0) | 6.2  (15.9) | 64.5  (33.8) | 16.3 (16.2) |
| **Basic medicines** |  |  |  |  |  |
| Salbutamol tablet | 3  (100.0) | 16  (38.1) | 104  (97.2) | 6  (46.2) | 129  (78.2) |
| Amoxicillin | 3  (100.0) | 35  (83.3) | 104  (97.2) | 10  (76.9) | 152  (92.1) |
| Azithromycin | 3  (100.0) | 12  (28.6) | 0  (0.0) | 9  (69.2) | 24  (14.5) |
| Calcium channel blocker | 3  (100.0) | 11  (26.2) | 3  (2.8) | 8  (61.5) | 25  (15.2) |
| Aspirin | 3  (100.0) | 9  (21.4) | 0  (0.0) | 9  (69.2) | 21  (12.7) |
| Metformin | 3  (100.0) | 10  (23.8) | 1  (0.9) | 6  (46.2) | 20  (12.1) |
| Amitriptyline tablet | 0  (0.0) | 0  (0.0) | 0  (0.0) | 4  (30.8) | 4  (2.4) |
| Paracetamol | 3  (100.0) | 40  (95.2) | 102  (95.3) | 13  (100.0) | 158  (95.8) |
| Chlorpheniramine | 3  (100.0) | 33  (78.6) | 103  (96.3) | 7  (53.8) | 146  (88.5) |
| Diazepam | 3  (100.0) | 12  (28.6) | 0  (0.0) | 4  (30.8) | 19  (11.5) |
| Ibuprofen | 0  (0.0) | 3  (7.1) | 0  (0.0) | 7  (53.8) | 10  (6.1) |
| Penicillin | 3  (100.0) | 8  (19.0) | 97  (90.7) | 6  (46.2) | 114  (69.1) |
| Erythromycin | 2  (66.7) | 1  (2.4) | 0  (0.0) | 5  (38.5) | 8  (4.8) |
| **Mean (± SD)** | 83.3  (36.4) | 34.4  (30.0) | 34.0  (46.8) | 28.3  (9.6) | 34.1 (34.7) |
| **Overall readiness index for general NCD service** |  |  |  |  |  |
| **Mean (± SD)** | 82.1  (16.9) | 39.6  (23.6) | 38.6  (25.2) | 56.6  (19.5) | 42.2  (21.5) |

**Supplementary Table 2: Diabetes (DM) related readiness index score by facility type**

| **Indicators** | **Upazila Health Complex** | **Union-level public facilities** | **Community Clinic** | **Private/NGO facility** | **Total** |
| --- | --- | --- | --- | --- | --- |
| **n=3** | **n=42** | **n=108** | **n=26** | **n=179** |
| **n (%)** | **n (%)** | **n (%)** | **n (%)** | **n (%)** |
| **Clinical service, staff and guidelines** |  |  |  |  |  |
| Provide clinical services (diagnosis or follow-up or referral) | 3  (100.0) | 14  (33.3) | 39  (36.1) | 19  (73.1) | 75  (41.9) |
| Guidelines on diagnosis and treatment | 2  (66.7) | 1  (2.4) | 0  (0.0) | 0  (0.0) | 3  (1.7) |
| At least one trained staff | 3  (100.0) | 2  (4.8) | 35  (32.4) | 1  (3.9) | 41  (22.9) |
| **Mean (± SD)** | 88.9  (19.2) | 13.5  (17.2) | 22.8 (19.9) | 25.6  (41.1) | 22.2  (20.1) |
| **Equipment** |  |  |  |  |  |
| Glucometer | 3  (100.0) | 20  (47.6) | 54  (50.0) | 12  (46.2) | 89  (49.7) |
| Glucometer strip | 3  (100.0) | 19  (45.2) | 44  (40.7) | 12  (46.2) | 78  (43.6) |
| Adult weighing scale | 3  (100.0) | 34  (81.0) | 81  (75.0) | 24  (92.3) | 142  (79.3) |
| Height board/ Stadiometer | 1  (33.3) | 21  (50.0) | 70  (64.8) | 7  (26.9) | 99  (55.6) |
| Urine protein test strips | 2  (66.7) | 13  (31.0) | 2  (1.9) | 21  (80.8) | 38  (21.2) |
| Urine ketones test strips | 0  (0.0) | 0  (0.0) | 0  (0.0) | 1  (3.8) | 1  (0.6) |
| Ophthalmoscope | 0  (0.0) | 0  (0.0) | 1  (0.9) | 3  (11.5) | 4  (2.2) |
| **Mean (± SD)** | 57.1  (46.0) | 36.4  (29.0) | 33.3  (32.2) | 44.0  (33.3) | 36.0  (29.2) |
| **Diagnostic capacity** |  |  |  |  |  |
| Random blood glucose | 3  (100.0) | 20  (47.6) | 52  (48.1) | 24  (92.3) | 99  (55.6) |
| Fasting blood glucose | 3  (100.0) | 3  (7.1) | 8  (7.4) | 23  (88.5) | 37  (20.7) |
| Oral Glucose tolerance test (OGTT) | 1  (33.3) | 0  (0.0) | 0  (0.0) | 21  (80.8) | 22  (12.3) |
| HbA1C | 1  (33.3) | 0  (0.0) | 0  (0.0) | 9  (34.6) | 10  (5.6) |
| Urine protein test | 2  (66.7) | 9  (21.4) | 0  (0.0) | 21  (80.8) | 32  (17.9) |
| Urine ketones test | 0  (0.0) | 0  (0.0) | 0  (0.0) | 1  (3.8) | 1  (0.6) |
| Urine glucose test | 3  (100.0) | 3  (7.1) | 0  (0.0) | 23  (88.5) | 29  (16.2) |
| Fundoscopy | 0  (0.0) | 0  (0.0) | 0  (0.0) | 1  (3.8) | 1  (0.6) |
| Total cholesterol | 1  (33.3) | 0  (0.0) | 0  (0.0) | 15  (57.7) | 16  (8.9) |
| **Mean (± SD)** | 51.9  (41.2) | 9.3  (16.0) | 6.2  (15.9) | 59.0  (36.2) | 15.3  (16.6) |
| **Medicines** |  |  |  |  |  |
| Metformin | 3  (100.0) | 10  (23.8) | 1  (0.9) | 6  (46.2) | 20  (12.1) |
| Gliclazide | 3  (100.0) | 3  (7.1) | 0  (0.0) | 1  (7.7) | 7  (4.2) |
| Insulin injection | 3  (100.0) | 0  (0.0) | 0  (0.0) | 3  (23.1) | 6  (3.6) |
| Glucose 50% injection | 0  (0.0) | 0  (0.0) | 0  (0.0) | 1  (7.7) | 1  (0.6) |
| **Mean (± SD)** | 75.0  (50.0) | 7.7  (11.2) | 0.2  (0.5) | 10.6  (9.1) | 4.7  (4.5) |
| **Overall readiness index for services specific to diabetes** |  |  |  |  |  |
| **Mean (± SD)** | **68.2**  **(39.1)** | **16.7**  **(18.4)** | **15.6**  **(17.1)** | **34.8**  **(29.9)** | **19.6**  **(17.6)** |

**Supplementary Table 3: Cardiovascular disease (CVD) related readiness index score by facility type**

| **Indicators** | **Upazila Health Complex** | **Union-level public facilities** | **Community Clinic** | **Private/NGO facility** | **Total** |
| --- | --- | --- | --- | --- | --- |
| **n=3** | **n=42** | **n=108** | **n=26** | **n=179** |
| **n (%)** | **n (%)** | **n (%)** | **n (%)** | **n (%)** |
| **Clinical service, staff and guidelines** |  |  |  |  |  |
| Provide clinical services (diagnosis or follow-up or referral) | 3  (100.0) | 25  (59.5) | 77  (71.3) | 23  (88.5) | 128  (71.5) |
| Guidelines on diagnosis and treatment | 2  (66.7) | 0  (0.0) | 0  (0.0) | 0  (0.0) | 2  (1.1) |
| At least one trained staff | 3  (100.0) | 2  (4.8) | 38  (35.2) | 1  (3.9) | 44  (24.6) |
| **Mean (± SD)** | 88.9  (19.2) | 21.4  (33.1) | 35.5  (35.6) | 30.8  (50.0) | 32.4  (35.8) |
| **Equipment** |  |  |  |  |  |
| Blood pressure apparatus | 3  (100.0) | 37  (88.1) | 97  (92.4) | 24  (100.0) | 161  (92.5) |
| Adult weighing scale | 3  (100.0) | 34  (89.5) | 81  (81.8) | 24  (100.0) | 142  (86.6) |
| Height board/ Stadiometer | 1 (50.0) | 21  (87.5) | 70  (90.9) | 7  (70.0) | 99  (87.6) |
| Stethoscope | 3  (100.0) | 38  (90.5) | 86  (89.6) | 24  (100.0) | 151  (91.5) |
| Measuring tape | 2 (66.7) | 20  (47.6) | 65  (60.2) | 8  (30.8) | 95  (53.1) |
| **Mean (± SD)** | 80.0  (29.8) | 71.4  (21.0) | 73.9  (11.8) | 66.9  (34.8) | 72.4  (17.1) |
| **Diagnostic capacity** |  |  |  |  |  |
| Lipid profile | 0  (0.0) | 0  (0.0) | 0  (0.0) | 16  (61.5) | 16  (8.9) |
| Serum electrolytes | 0  (0.0) | 0  (0.0) | 0  (0.0) | 3  (11.5) | 3  (1.7) |
| Serum creatinine | 1  (33.3) | 0  (0.0) | 0  (0.0) | 21  (80.8) | 22  (12.3) |
| Electrocardiogram (ECG) | 3  (100.0) | 0  (0.0) | 0  (0.0) | 20  (76.9) | 23  (12.8) |
| Troponin I | 0  (0.0) | 0  (0.0) | 0  (0.0) | 6  (23.1) | 6  (3.4) |
| **Mean (± SD)** | 26.7  (43.5) | 0  (0.0) | 0  (0.0) | 50.8  (31.6) | 7.8  (5.1) |
| **Medicines** |  |  |  |  |  |
| Calcium channel blocker (Amlodipine) | 3  (100.0) | 11  (26.2) | 3  (2.8) | 8  (61.5) | 25  (15.2) |
| Angiotensin Receptor Blocker (Losartan potassium) | 3  (100.0) | 6  (14.3) | 0  (0.0) | 7  (53.8) | 16  (9.7) |
| Thiazide diuretics | 3  (100.0) | 1  (2.4) | 0  (0.0) | 0  (0.0) | 4  (2.4) |
| Beta blocker | 2  (66.7) | 3  (7.1) | 0  (0.0) | 7  (53.8) | 12  (7.3) |
| Angiotensin Converting Enzyme inhibitor | 0  (0.0) | 0  (0.0) | 0  (0.0) | 1  (7.7) | 1  (0.6) |
| Glyceryl trinitrate sublingual tablet | 2  (66.7) | 0  (0.0) | 0  (0.0) | 0  (0.0) | 2  (1.2) |
| **Mean (± SD)** | 72.2  (39.0) | 8.3  (10.3) | 0.5  (1.1) | 14.7  (14.9) | 5.6  (5.3) |
| **Overall readiness index for services specific to cardiovascular disease** |  |  |  |  |  |
| **Mean (± SD)** | 66.9  (32.9) | 25.3  (16.1) | 27.5  (12.1) | 40.8  (32.8) | 29.6  (15.8) |

**Supplementary Table 4: Chronic respiratory disease (CRD) related readiness index score by facility type**

| **Indicators** | **Upazila Health Complex** | **Union-level public facilities** | **Community Clinic** | **Private/NGO facility** | **Total** |
| --- | --- | --- | --- | --- | --- |
| **n=3** | **n=42** | **n=108** | **n=26** | **n=179** |
| **n (%)** | **n (%)** | **n (%)** | **n (%)** | **n (%)** |
| **Clinical service, staff and guidelines** |  |  |  |  |  |
| Provide clinical services for Asthma (diagnosis or follow-up or referral) | 3  (100.0) | 21  (50.0) | 82  (75.9) | 18  (69.2) | 124  (69.3) |
| Provide clinical services for COPD (diagnosis or follow-up or referral) | 3  (100.0) | 11  (26.2) | 20  (18.5) | 13  (50.0) | 47  (26.3) |
| Guidelines on diagnosis and treatment | 2  (66.7) | 0  (0.0) | 0  (0.0) | 0  (0.0) | 2  (1.1) |
| At least one trained staff | 3  (100.0) | 2  (4.8) | 31  (28.7) | 1  (3.9) | 37  (20.7) |
| **Mean (± SD)** | 91.7  (16.7) | 20.2  (22.9) | 30.8  (32.4) | 30.8  (34.3) | 29.3  (28.7) |
| **Equipment** |  |  |  |  |  |
| Adult weighing scale | 3  (100.0) | 34  (81.0) | 81  (75.0) | 24  (92.3) | 142  (79.3) |
| Height board/ Stadiometer | 1  (33.3) | 21  (50.0) | 70  (64.8) | 7  (26.9) | 99  (55.6) |
| Spacer for inhaler | 0  (0.0) | 0  (0.0) | 0  (0.0) | 4  (22.2) | 4  (2.9) |
| Peak flowmeter | 1  (33.3) | 0  (0.0) | 0  (0.0) | 0  (0.0) | 1  (0.7) |
| Pulse oximeter | 3  (100.0) | 7  (16.7) | 22  (20.4) | 9  (34.6) | 41  (22.9) |
| Oxygen | 3  (100.0) | 15  (35.7) | 0  (0.0) | 6  (46.2) | 24  (14.6) |
| **Mean (± SD)** | 61.1  (44.3) | 30.6  (31.6) | 26.7  (34.5) | 32.1  (31.8) | 29.0 (31.7) |
| **Diagnostic capacity** |  |  |  |  |  |
| X-ray | 1  (33.3) | 0  (0.0) | 0  (0.0) | 17  (65.4) | 18  (10.1) |
| Spirometry | 0  (0.0) | 0  (0.0) | 0  (0.0) | 0  (0.0) | 0  (0.0) |
| Full blood count | 3  (100.0) | 0  (0.0) | 0  (0.0) | 18  (69.2) | 21  (11.7) |
| **Mean (± SD)** | 44.4  (50.9) | 0  (0.0) | 0  (0.0) | 44.9  (38.9) | 7.3  (6.3) |
| **Medicines** |  |  |  |  |  |
| Beclomethasone inhaler | 0  (0.0) | 1  (2.4) | 0  (0.0) | 1  (7.7) | 2  (1.2) |
| Salbutamol tablet | 3  (100.0) | 16  (38.1) | 104  (97.2) | 6  (46.2) | 129  (78.2) |
| Salbutamol + Ipratropium bromide inhaler | 0  (0.0) | 1  (2.4) | 1  (0.9) | 2  (15.4) | 4  (2.4) |
| Budesonide inhaler + Formoterol | 0  (0.0) | 0  (0.0) | 0  (0.0) | 1  (7.7) | 1  (0.6) |
| Ipratropium bromide | 3  (100.0) | 3  (7.1) | 50  (46.7) | 2  (15.4) | 58  (35.2) |
| Montelukast | 3  (100.0) | 3  (7.1) | 0  (0.0) | 8  (61.5) | 14  (8.5) |
| Hydrocortisone injection | 3  (100.0) | 0  (0.0) | 0  (0.0) | 3  (23.1) | 6  (3.6) |
| **Mean (± SD)** | 57.1  (53.5) | 8.2  (13.5) | 20.5  (37.6) | 12.6  (10.3) | 17.1 (26.7) |
| **Overall readiness index for services specific to CRD** |  |  |  |  |  |
| **Mean (± SD)** | 63.6  (41.3) | 14.7  (17.0) | 19.5  (26.1) | 30.1  (28.8) | 20.7  (23.4) |

**Supplementary Table 5: Cervical cancer related readiness index score by facility type**

| **Indicators** | **Upazila Health Complex** | **Union-level public facilities** | **Community Clinic** | **Private/NGO facility** | **Total** |
| --- | --- | --- | --- | --- | --- |
| **n=3** | **n=42** | **n=108** | **n=26** | **n=179** |
| **n (%)** | **n (%)** | **n (%)** | **n (%)** | **n (%)** |
| **Clinical service, staff and guidelines** |  |  |  |  |  |
| Provide clinical services for cervical cancer (diagnosis or follow-up or referral) | 3  (100.0) | 0  (0.0) | 0  (0.0) | 0  (0.0) | 3  (1.7) |
| Guidelines on diagnosis and treatment | 0  (0.0) | 0  (0.0) | 0  (0.0) | 0  (0.0) | 0  (0.0) |
| At least one trained staff | 3  (100.0) | 1  (2.4) | 49  (45.4) | 1  (3.9) | 54  (30.2) |
| **Mean (± SD)** | 66.7 (57.7) | 0.8  (1.4) | 15.1  (26.2) | 1.3  (2.2) | 10.6  (17.0) |
| **Equipment** |  |  |  |  |  |
| Acetic acid or Lugol’s iodine | 3  (100.0) | 0  (0.0) | 0  (0.0) | 0  (0.0) | 3  (1.7) |
| Speculum | 3  (100.0) | 0  (0.0) | 0  (0.0) | 0  (0.0) | 3  (1.7) |
| Glass slides | 1  (33.3) | 0  (0.0) | 0  (0.0) | 0  (0.0) | 1  (0.6) |
| Latex gloves | 3  (100.0) | 0  (0.0) | 0  (0.0) | 0  (0.0) | 3  (1.7) |
| Goose-neck lamp | 2  (66.7) | 0  (0.0) | 0  (0.0) | 0  (0.0) | 2  (1.2) |
| Digital cervicography equipment | 1  (33.3) | 0  (0.0) | 0  (0.0) | 0  (0.0) | 1  (0.6) |
| **Mean (± SD)** | 72.2  (32.8) | 0  (0.0) | 0  (0.0) | 0  (0.0) | 1.2  (0.5) |
| **Diagnostic capacity** |  |  |  |  |  |
| Visual inspection with acetic acid (VIA) | 3  (100.0) | 0  (0.0) | 0  (0.0) | 0  (0.0) | 3  (1.7) |
| HPV test | 0  (0.0) | 0  (0.0) | 0  (0.0) | 0  (0.0) | 0  (0.0) |
| Colposcopy | 0  (0.0) | 0  (0.0) | 0  (0.0) | 0  (0.0) | 0  (0.0) |
| **Mean (± SD)** | 33.3 (57.7) | 0  (0.0) | 0  (0.0) | 0  (0.0) | 0.6 (1.0) |
| **Medicines** |  |  |  |  |  |
| Chlorpheniramine | 3  (100.0) | 33  (78.6) | 103  (96.3) | 7  (53.8) | 146  (88.5) |
| Diazepam | 3  (100.0) | 12  (28.6) | 0  (0.0) | 4  (30.8) | 19  (11.5) |
| Morphine | 0  (0.0) | 0  (0.0) | 0  (0.0) | 0  (0.0) | 0  (0.0) |
| **Mean (± SD)** | 66.7 (57.7) | 35.7 (39.8) | 31.8  (55.1) | 14.1  (13.5) | 30.7  (44.3) |
| **Overall readiness index for services specific to cervical cancer** |  |  |  |  |  |
| **Mean (± SD)** | 59.7  (51.5) | 9.1  (10.3) | 11.7  (20.3) | 3.8  (3.9) | 10.8  (15.7) |

**Supplementary Table 6: Mental health related readiness index score by facility type**

| **Indicators** | **Upazila Health Complex** | **Union-level public facilities** | **Community Clinic** | **Private/NGO facility** | **Total** |
| --- | --- | --- | --- | --- | --- |
| **n=3** | **n=42** | **n=108** | **n=26** | **n=179** |
| **n (%)** | **n (%)** | **n (%)** | **n (%)** | **n (%)** |
| **Clinical service, staff and guidelines** |  |  |  |  |  |
| Provide clinical services for mental health (diagnosis or follow-up or referral) | 2  (66.7) | 8  (19.0) | 20  (18.5) | 5  (19.2) | 35  (19.6) |
| Guidelines on diagnosis and treatment | 1  (33.3) | 0  (0.0) | 0  (0.0) | 0  (0.0) | 1  (0.6) |
| At least one trained staff | 2  (66.7) | 0  (0.0) | 5  (4.6) | 0  (0.0) | 7  (3.9) |
| **Mean (± SD)** | 55.6  (19.2) | 6.3  (11.0) | 7.7  (9.6) | 6.4  (11.1) | 8.0  (10.1) |
| **Medicines** |  |  |  |  |  |
| Amitriptyline | 0  (0.0) | 0  (0.0) | 0  (0.0) | 4  (30.8) | 4  (2.4) |
| Benzodiazepine | 2  (66.7) | 0  (0.0) | 0  (0.0) | 0  (0.0) | 2  (1.2) |
| Carbamazepine | 0  (0.0) | 0  (0.0) | 0  (0.0) | 1  (7.7) | 1  (0.6) |
| Clozapine | 0  (0.0) | 1  (2.4) | 0  (0.0) | 4  (30.8) | 5  (3.0) |
| Fluoxetine | 0  (0.0) | 0  (0.0) | 0  (0.0) | 1  (7.7) | 1  (0.6) |
| Haloperidol | 0  (0.0) | 0  (0.0) | 0  (0.0) | 1  (7.7) | 1  (0.6) |
| Sodium valproate | 0  (0.0) | 0  (0.0) | 0  (0.0) | 1  (7.7) | 1  (0.6) |
| **Mean (± SD)** | 9.5  (25.2) | 0.3  (0.9) | 0  (0.0) | 6.6  (6.2) | 1.2  (0.9) |
| **Overall readiness index for services specific to mental health** |  |  |  |  |  |
| **Mean (± SD)** | **32.5**  **(22.2)** | **3.3**  **(5.9)** | **3.9**  **(4.8)** | **6.5**  **(8.6)** | **4.6**  **(5.5)** |
