# Supplementary material for: The Readiness of Primary Healthcare Facilities to Address Noncommunicable Diseases in Rural Bangladesh
Source: Research Square preprint supplement (doi:10.21203/rs.3.rs-7977902/v1), 2025-11-12
Supplement: Supplementary file 2 [file a58dc5a2ac627c63a9e48f8a.docx]

| **Questionnaire for service availability and readiness assessment (SARA) interview**  *(Find the manager, the person in charge of the facility, or the most senior health worker responsible for outpatient services which is present at the facility. Read the following greeting)*  **Title:** **Addressing Gaps in the Hypertension and Diabetes Care Continuum through mHealth and Decentralized Primary Care: The Dinajpur Study** |
| --- |

**Section 1: Basic information**

| **Number** | **Variable number** | **Question** | **Answer** | **Instruction** |
| --- | --- | --- | --- | --- |
| **101** | **FBI_101** | Date of the interview 1 | ______/_____/202_ (mm/dd/yy) |  |
| **102** | **FBI_102** | Start time of the interview 1 | _____:_____ | 24-hour format |
| **103** | **FBI_103** | Type of the facility | 1. Upazila Health Complex  2. Union health and family welfare center  3. Union sub-center  4. Urban dispensary  5. Urban primary health care clinic  6. Community clinic  7. NGO Clinic/Hospital  8. Private clinic/Hospital  9. Private diagnostic center  10. Other: _____________ | Select any one |
| **104** | **FBI_104** | Which of the responses best describes the managing authority for this facility?  *That is, the authority that makes policy decisions and provides supervision for the facility.* | 1.Ministry of Health; Directorate General of Health Services (DGHS)  2. Ministry of Health; Directorate General of Family Planning (DGFP)  3. NGO/Nonprofit  4. Mission/ Faith-based  5. Private-For profit |  |
| **105** | **FBI_105** | Location of the facility | 1. Rural 2. Urban |  |
| **106** | **FBI_106** | Sub-district name where facility is located |  |  |
| **107** | **FBI_107** | Union/Ward name where facility is located |  |  |
| **108** | **FBI_108** | Name of the facility and code |  |  |
| **109** | **FBI_109** | Facility ID |  | To be autogenerated |
| **110** | **FBI_110** | Name of the interviewee 1 | _______________________ | In English |
| **111** | **FBI_111** | Type of the interviewee 1 | 1. Physician: UH&FPO  2. Physician: Junior Consultant  3. Physician: Medical Officer/ Assistant Surgeon  4. Dental Surgeon  5. SACMO  6. Nurse  7. Medical Technologist  8. Pharmacist  9. Cardiographer  10. Compounder  11. Emergency attendant  12. Herbal Assistant  13. Lab Attendant  14. Nursing Attendant  15. OT Attendant  16. OT Boy  17. TB and leprosy control Assistant  18. Ward boy  19. Accountant  20. Chief Assistant  21. Statistician  22. Driver  23. Junior Mechanics  24. Office assistant cum typist  25. Medical Assistant  26. Midwife  27. Family welfare visitor (FWV)  28. Ayah  29. CHCP  30. Community health worker (CHW)/ Swastho kormi (SK)  31. Family welfare assistant (FWA)  32. Health Assistant (HA)  33. Swastho kormi (SK)  34. Family Planning Inspector (FPI)  35. Health Inspector (HI)  36. Sanitary Inspector  37. Assistant Family Planning Inspector (AFPI)  38. Assistant Health Inspector (AHI)  39. Cashier  40. COOK/Masalchi  41. Gardener  42. MLSS  43. Security guard  44. Storekeeper  45. Sweeper/ Cleaner  46. Program manager  47. Program Officer  48. Shastho Sebika  49. Others: _______________________ | Select from list. Collect information from the facility manager. In her/his absence approach the next knowledgeable person. |
| **112** | **FBI_112** | Service level available | 1. Outpatient  2. Inpatient  3. Diagnostic | Answer can be multiple |
| **113** | **FBI_113** | Availability of out-patient services | A. From _________  B. To____________ |  |
| **114** | **FBI_114** | Availability of diagnostic services | A. From _________  B. To____________ |  |
| **115** | **FBI_115** | On average, how many days per week is this facility open for non-emergency outpatient services? | ______Days |  |
| **116** | **FBI_116** | On average, how many days per week is this facility open for diagnostic services? | ______Days |  |

| **BI_117.**  **In which year was this facility established?** | ______________ | Write in year |
| --- | --- | --- |

**Section 2: Staffing**

| **201** | **FST_201** | Does this facility have a staffing plan, with authorized allocated numbers of staff, by qualification? | 1. Yes  2. No |  |
| --- | --- | --- | --- | --- |
| **202** | **FST_202** | How many staff are there in the facility? | **_____________________** | In number |

|  |  | Occupation/Qualification | **(A)**  **Official Authorized/Allocated Numbers of Staff for Each Occupation (If 0, skip to col C)** | **(B)**  **Total Allocated Positions Vacant for More Than 6 Months in The Past 12 Months** | **(C)**  **Total Staff Assigned, Employed, Seconded (Including Part-Time Employees)**  **(If 0, skip to next row)** | **(D)**  **Total Part-Time (From Among Those in Col C)** | **(E)**  **Total Casual/Contracted Staff (From Among Those in Col C)** |  |
| --- | --- | --- | --- | --- | --- | --- | --- | --- |
| **203** | **FST_203** | Physician: UH&FPO |  |  |  |  |  |  |
| **203** | **FST_204** | Physician: Junior Consultant |  |  |  |  |  |  |
| **204** | **FST_205** | Physician: Medical Officer/ Assistant Surgeon |  |  |  |  |  |  |
| **205** | **FST_206** | Dental Surgeon |  |  |  |  |  |  |
| **207** | **FST_207** | SACMO |  |  |  |  |  |  |
| **208** | **FST_208** | Medical assistant/ Paramedics |  |  |  |  |  |  |
| **209** | **FST_209** | Nurse |  |  |  |  |  |  |
| **210** | **FST_210** | Midwife |  |  |  |  |  |  |
| **211** | **FST_211** | Family welfare visitor (FWV) |  |  |  |  |  |  |
| **212** | **FST_212** | Medical Technologist |  |  |  |  |  |  |
| **213** | **FST_213** | Pharmacist |  |  |  |  |  |  |
| **214** | **FST_214** | Ayah |  |  |  |  |  |  |
| **215** | **FST_215** | Cardiographer |  |  |  |  |  |  |
| **216** | **FST_216** | CHCP |  |  |  |  |  |  |
| **217** | **FST_217** | Community health worker (CHW)/ Swastho kormi (SK)/ Multi-purpose health volunteer (MHV) |  |  |  |  |  |  |
| **218** | **FST_218** | Compounder |  |  |  |  |  |  |
| **219** | **FST_219** | Emergency attendant |  |  |  |  |  |  |
| **220** | **FST_220** | Family welfare assistant (FWA) |  |  |  |  |  |  |
| **221** | **FST_221** | Health Assistant (HA) |  |  |  |  |  |  |
| **222** | **FST_222** | Herbal Assistant |  |  |  |  |  |  |
| **223** | **FST_223** | Lab Attendant |  |  |  |  |  |  |
| **224** | **FST_224** | Nursing Attendant |  |  |  |  |  |  |
| **225** | **FST_225** | OT Attendant |  |  |  |  |  |  |
| **226** | **FST_226** | OT Boy |  |  |  |  |  |  |
| **227** | **FST_227** | Swastho kormi (SK) |  |  |  |  |  |  |
| **228** | **FST_228** | TB and leprosy control Assistant |  |  |  |  |  |  |
| **229** | **FST_229** | Ward boy |  |  |  |  |  |  |
| **230** | **FST_230** | Accountant |  |  |  |  |  |  |
| **231** | **FST_231** | Chief Assistant |  |  |  |  |  |  |
| **232** | **FST_232** | Family Planning Inspector (FPI) |  |  |  |  |  |  |
| **233** | **FST_233** | Health Inspector (HI) |  |  |  |  |  |  |
| **234** | **FST_234** | Program manager |  |  |  |  |  |  |
| **235** | **FST_235** | Health Inspector (HI) |  |  |  |  |  |  |
| **236** | **FST_236** | Statistician |  |  |  |  |  |  |
| **237** | **FST_237** | Assistant Family Planning Inspector (AFPI) |  |  |  |  |  |  |
| **238** | **FST_238** | Assistant Health Inspector (AHI) |  |  |  |  |  |  |
| **239** | **FST_239** | Cashier |  |  |  |  |  |  |
| **240** | **FST_240** | Program Officer |  |  |  |  |  |  |
| **241** | **FST_241** | COOK/Masalchi |  |  |  |  |  |  |
| **242** | **FST_242** | Driver |  |  |  |  |  |  |
| **243** | **FST_243** | Gardener |  |  |  |  |  |  |
|  |  | Junior Mechanics |  |  |  |  |  |  |
| **244** | **FST_244** | MLSS |  |  |  |  |  |  |
| **245** | **FST_245** | Office assistant cum typist |  |  |  |  |  |  |
| **246** | **FST_246** | Security guard |  |  |  |  |  |  |
| **247** | **FST_247** | Storekeeper |  |  |  |  |  |  |
| **248** | **FST_248** | Sweeper/ Cleaner |  |  |  |  |  |  |

**Section 3: Infrastructure**

| **Number** | | **Variable number** | | **Question** | | **Answer** | | | **Instruction** |
| --- | --- | --- | --- | --- | --- | --- | --- | --- | --- |
| **301** | | **FIN_301A** | | What is the most commonly used source of water for the outpatient service area at this time? | | 1. Piped into facility  2. Piped into facility ground  3. Public tap/standpipe  4. Tube well/borehole  5. Protected dug well  6. Unprotected dug well  7. Protected spring  8. Unprotected spring  9. Rainwater  10. Bottled water  11. Cart with small tank/drum  12. Tanker truck  13. Surface water (river/dam/lake/pond)  96. Other  (specify)  77. Don’t know  0. No water source | | |  |
| **FIN_301B** | | During the past 7 days, was there any time when there was no water for the facility for more than 2 hours at a time? | | 1. Yes  2. No  77. Don’t know | | |  |
| **302** | | **FIN_302A** | | Does your facility have electricity from any source? | | 1. Yes  2. No | | |  |
| **FIN_302B** | | Other than the main or primary source, does the facility have a secondary or backup source of electricity like Generator, Solar, UPS, IPS? | | 1. Yes  2. No | | |  |
| **FIN_302C** | | During the past 7 days, was electricity available at all times from the main or any backup source? | | 1. Always available (no interruptions)  2. Often available (interruptions of under 2 hours per day)  3. Sometimes available (frequent or prolonged interruptions of more than 2 hours per day) | | |  |
| **303** | | **FIN_303A** | | Does this facility have a functioning land line telephone that is supported by the facility? | | 1. Yes  2. No | | |  |
| **FIN_303B** | | Does this facility have a functioning cellular phone that is supported by the facility? | | 1. Yes  2. No | | |  |
| **FIN_303C** | | Does this facility have a functioning Television that shows health related video? | | 1. Yes  2. No | | |  |
| **FIN_303D** | | Does the facility have a functioning video cassette player or DVD/ CD/ SD/mobile disk player used for health promotion? | | 1. Yes  2. No | | |  |
| **304** | | **FIN_304A** | | Does the facility have a functional toilet for staff use? | | 1. Yes  2. No | | |  |
| **FIN_304B** | | Type of toilet used by staff | | A. Flush toilet:  1. To sewer connection  2. To septic tank onsite  3. To open drain  B. Pit latrine:  1. With slab  2. Without slab/open pit  C. Composting toilet  D. Hanging toilet/hanging latrine  E. No toilet/latrine facilities on premises/bush/field | | |  |
| **FIN_304C** | | Observe if hand washing materials (soap and running water) are located within 5 m of the toilet. | | 1. Yes, observed  2. Yes, reported, not seen  3. No | | |  |
| **FIN_304D** | | Does the facility have a functional toilet for patients' use? | | 1. Yes  2. No | | |  |
| **FIN_304E** | | Type of toilet used by patients | | A. Flush toilet:  1. To sewer connection  2. To septic tank onsite  3. To open drain  B. Pit latrine:  1. With slab  2. Without slab/open pit  C. Composting toilet  D. Hanging toilet/hanging latrine  E. No toilet/latrine facilities on premises/bush/field | | |  |
| **FIN_304F** | | Observe if hand washing materials (soap and running water) are located within 5 m of the toilet. | | 1. Yes, observed  2. Yes, reported, not seen  3. No | | |  |
| **305** | | **FIN_305A** | | Does the facility have a functioning motorized vehicle to transfer patients to the referral facility? | | 1. Yes  2. No | | |  |
| **FIN_305B** | | Does the facility have a functioning non-motorized vehicle to transfer patients to the referral facility? | | 1. Yes  2. No | | |  |
| **306** | | **FIN_306A** | | Does this facility have a functioning computer/laptop? | | 1. Yes  2. No | | |  |
| **FIN_306B** | | Does this facility have a functioning tablet computer? | | 1. Yes  2. No | | |  |
| **FIN_306C** | | Is there access to internet or email within the facility today? | | 1. Yes  2. No | | |  |
| **307** | | **FIN_307A** | | Is there a room with auditory and visual privacy available for patient consultations? | | 1. Both auditory and visual privacy  2. Visual privacy only  3. Auditory privacy only  4. No privacy | | |  |
| **FIN_307B** | | Is there a bin for disposal of waste produced by the patients/visitors? | | 1. Yes, observed  2. Yes, reported, not seen  3. No | | |  |
| **Section 4: NCD services equipment and supplies**   | **401** | | **FNSE_401** | | Does this facility offer diagnosis or management of chronic diseases, such as diabetes, cardiovascular disease, chronic respiratory disease? | 1. Yes  2. No | | | | | | | | | |  | | --- | --- | --- | --- | --- | --- | --- | --- | --- | --- | --- | --- | --- | --- | --- | --- | |  | |  | **DIABETES** | | | | | | | | | | | |  | | **402** | | **FNSE_402** | Do providers in this facility diagnose and/or manage diabetes in patients? | | 1. Yes 2. No | | | | | | | | | | If response is NO then go to the Q. 407 | | **403** | |  | Does this facility provide any of the following services for diabetic patients: | | **YES** | | | | **NO** | | | | | |  | | **FNSE_403A** | Diagnose diabetes | | 1 | | | | 2 | | | | | |  | | **FNSE_403B** | Prescribe treatment for diabetes | | 1 | | | | 2 | | | | | |  | | **FNSE_403C** | Provide follow-up services for diabetic patients | | 1 | | | | 2 | | | | | |  | | **FNSE_403D** | Counselling for diabetic patient self- management including dietary advice, footcare, and follow-up | | 1 | | | | 2 | | | | | |  | | **404** | | **FNSE_404** | Does this facility have National guidelines for the diagnosis and management of diabetes available in this facility today | | 1. Yes, observed  2. Yes, reported, not seen  3. No | | | | | | | | | |  | | **405** | | **FNSE_405** | Have you or any provider(s) of diabetes services received any training in the diagnosis and management of diabetes in the past 2 years? | | 1. Yes  2. No | | | | | | | | | | If response is NO then go to the Q. 407 | | **406** | | **FNSE_406 A/B/C/D/E/F/G** | How many staffs received training on Diabetes in last two years? | | TOTAL | | | |  | | | | | | In number | | DOCTOR | | | |  | | | | | | | NURSE | | | |  | | | | | | | SACMO/MA/PARAMEDICS | | | |  | | | | | | | CHCP | | | |  | | | | | | | HA/FWA/SK | | | |  | | | | | | | MHV/SS | | | |  | | | | | |  | |  | |  | **CARDIOVASCULAR DISEASE (CVD)** | | | | | | | | | | | |  | | 407 | | **FNSE_407** | Do providers in this facility diagnose and/or manage cardiovascular diseases such as hypertension in patients? | | 1. Yes  2. No | | | | | | | | | | If response is NO then go to the Q.412 | | 408 | |  | Which of the following CVDs does this facility diagnose and treat or refer: | | **DIAGNOSE, TREAT, AND PATIENT FOLLOW-UP** | | | **PATIENT FOLLOW- UP ONLY** | | | **NO SERVICE/ REFER SUSPECT CASE** | | | |  | | **FNSE_408A** | Hypertension | | 1 | | | 2 | | | 3 | | | |  | | **FNSE_408B** | Acute myocardial infarction | | 1 | | | 2 | | | 3 | | | |  | | **FNSE_408C** | Congestive heart failure | | 1 | | | 2 | | | 3 | | | |  | | **FNSE_408D** | Cerebral vascular event (stroke) | | 1 | | | 2 | | | 3 | | | |  | | **409** | |  | Does this facility have any of the following documents in this service site:  *IF YES, ASK: May I see the documents?* | | **YES, OBSERVED** | | | **YES, REPORTED, NOT SEEN** | | | **NO** | | | |  | | **FNSE_409A** | National guidelines for the diagnosis and management of cardiovascular diseases available in this facility today | | 1 | | | 2 | | | 3 | | | |  | | **FNSE_409B** | WHO/ISH CVD risk prediction chart (Laboratory) available in this facility today | | 1 | | | 2 | | | 3 | | | |  | | **FNSE_409C** | WHO/ISH CVD risk prediction chart (Non-laboratory) available in this facility today | | 1 | | | 2 | | | 3 | | | |  | | **410** | | **FNSE_410** | Have you or any provider(s) of services for cardiovascular diseases received any training in the diagnosis and management of cardiovascular diseases, such as hypertension, in the past 2 years? | | 1. Yes 2. No | | | | | | | | | | If response is NO then go to the Q.412 | | **411** | | **FNSE_411A/B/C/D/E/F/G** | How many staffs received training on hypertension and CVD in last two years? | | TOTAL | | | |  | | | | | | In number | | DOCTOR | | | |  | | | | | | | NURSE | | | |  | | | | | | | SACMO/MA/PARAMEDICS | | | |  | | | | | | | CHCP | | | |  | | | | | | | HA/FWA/SK | | | |  | | | | | | | MHV/SS | | | |  | | | | | |  | |  | |  | **CHRONIC RESPIRATORY DISEASE (CRD)** | | | | | | | | | | | |  | | **412** | | **FNSE_412** | Do providers in this facility diagnose and/or manage chronic respiratory diseases in patients? | | 1. Yes 2. No | | | | | | | | | | If response is NO then go to the Q.418 | | **413** | |  | Which of the following chronic respiratory diseases does this facility diagnose and treat or refer:  *Specify exactly how the facility manages chronic respiratory*  *disease.* | | **DIAGNOSE, TREAT, AND PATIENT FOLLOW-UP** | | | **PATIENT FOLLOW- UP ONLY** | | | **NO SERVICE/ REFER SUSPECT CASE** | | | |  | | **FNSE_413A** | Asthma | | 1 | | | 2 | | | 3 | | | |  | | **FNSE_413B** | Chronic obstructive pulmonary disease (COPD) | | 1 | | | 2 | | | 3 | | | |  | | **414** | |  | Please tell me if the following basic equipment items are available and functional in this service area today:  *Ask to see each item that is available.* | | **(A) AVAILABLE** | | | | **(B) FUNCTIONING** | | | | | |  | | **YES, OBSERVED** | **YES, REPORTED, NOT SEEN** | | **NO** | **YES** | | **NO** | | | **DON’T KNOW** |  | | **FNSE_414A** | Peak flow meters | | 1  *If 1 go to col B* | 2  *If 2 go to col B* | | 3  *If 3 go to next Q* | 1 | | 2 | | | 8 |  | | **FNSE_414B** | Spacers for inhalers | | 1  *If 1 go to col B* | 2  *If 2 go to col B* | | 3  *If 3 go to Q.* *415* | 1 | | 2 | | | 8 |  | | **415** | | **FNSE_415** | Does this facility have National guidelines for the diagnosis and management of chronic respiratory diseases available in this facility today | | 1. Yes, observed  2. Yes, reported, not seen  3. No | | | | | | | | | |  | | **416** | | **FNSE_416** | Have you or any provider(s) of services for chronic respiratory diseases received any training in the diagnosis and management of chronic respiratory diseases in the past 2 years? | | 1. Yes 2. No | | | | | | | | | | If response is NO then go to the Q. 418 | | **417** | | **FNSE_417 A/B/C/D/E/F/G** | How many staffs received training on COPD/Asthma in last two years? | | TOTAL | | | |  | | | | | | In Number | | DOCTOR | | | |  | | | | | | | NURSE | | | |  | | | | | | | SACMO/MA/PARAMEDICS | | | |  | | | | | | | CHCP | | | |  | | | | | | | HA/FWA/SK | | | |  | | | | | | | MHV/SS | | | |  | | | | | |  | |  | |  | **CANCER** | | | | | | | | | | | |  | | **418** | | **FNSE_418** | Does this facility offer screening, diagnosis and/or treatment services for any cancers? | | 1. Yes 2. No | | | | | | | | | | If No, go to the Q.443 | |  | |  | IF CANCERS ARE DIAGNOSED AND TREATED IN A DIFFERENT LOCATION THAN WHERE YOU ARE, ASK TO BE SHOWN THE LOCATION IN THE FACILITY WHERE SERVICES FOR CANCER ARE PROVIDED. FIND THE PERSON MOST KNOWLEDGEABLE ABOUT CANCER SERVICES IN THE FACILITY. INTRODUCE YOURSELF, EXPLAIN THE PURPOSE OF THE SURVEY AND ASK THE FOLLOWING QUESTIONS. | | | | | | | | | | | |  | |  | |  | **PRACTICES FOR MONITORING AND EVALUATING CANCER SERVICES** | | | | | | | | | | | |  | | **419** | | **FNSE_419** | Are there registers or databases where information is recorded for patients who are screened or tested for cancer and then diagnosed, that provide information on treatment adherence and outcomes?  *IF YES, ask to see the registry database.* | | 1. Yes, observed  2. Yes, reported, not seen  3. No | | | | | | | | | |  | | **420** | | **FNSE_420** | Are newly diagnosed cancer patients reported to a national cancer registry? | | 1. Yes 2. No | | | | | | | | | |  | | **421** | | **FNSE_421** | Are newly diagnosed cancer patients reported to/entered into a facility cancer registry? | | 1. Yes, observed  2. Yes, reported, not seen  3. No | | | | | | | | | |  | |  | |  | **CERVICAL CANCER** | | | | | | | | | | | |  | | **422** | | **FNSE_422** | Does this facility have any services for screening, diagnosing or treating cervical cancer? | | 1. Yes  2. No | | | | | | | | | | If response is No then go to the Q. 428 | |  | |  | FIND THE MOST KNOWLEDGEABLE PERSON ABOUT THE CERVICAL CANCER DIAGNOSTIC SERVICES. | | | | | | | | | | | |  | | 423 | |  | Which of the following services for cervical cancer screening, diagnosis, and treatment are used in this facility: | | **YES** | | | | **NO** | | | | | |  | | **FNSE_423A** | Collect PAP smear specimen | | 1 | | | | 2 | | | | | |  | | **FNSE_423B** | Read PAP smear results | | 1 | | | | 2 | | | | | |  | | **FNSE_423C** | Read results for HPV test | | 1 | | | | 2 | | | | | |  | | **FNSE_423D** | Colposcopy and biopsy | | 1 | | | | 2 | | | | | |  | | **FNSE_423E** | Perform digital cervicography | | 1 | | | | 2 | | | | | |  | | **FNSE_423F** | Treatment of pre-invasive cervical cancer lesions (e.g. cryotherapy, thermal/cold coagulation or loop electrosurgical excision procedure [LEEP]) | | 1 | | | | 2 | | | | | |  | | **424** | |  | Please tell me if the following basic equipment items are available and functional in this service area today:  *Ask to see each item that is available.* | | **(A) AVAILABLE** | | | | **(B) FUNCTIONING** | | | | | |  | | **YES, OBSERVED** | **YES, REPORTED, NOT SEEN** | | **NO** | **YES** | | **NO** | | | **DON’T KNOW** |  | | **FNSE_424A** | Acetic acid or Lugol’s iodine for visual inspection (VIA or VIA/VILI) | | 1 | 2 | | 3 |  | |  | | |  |  | | **FNSE_424B** | Speculum | | 1  *If 1 go to col B* | 2  *If 2 go to col B* | | 3  *If 3 go to next Q* | 1 | | 2 | | | 8 |  | | **FNSE_424C** | Glass slides | | 1 | 2 | | 3 |  | |  | | |  |  | | **FNSE_424D** | Latex gloves | | 1 | 2 | | 3 |  | |  | | |  |  | | **FNSE_424E** | Goose-neck lamp | | 1  *If 1 go to col B* | 2  *If 2 go to col B* | | 3  *If 3 go to next Q* | 1 | | 2 | | | 8 |  | | **FNSE_424F** | Gynaecological examination table | | 1  *If 1 go to col B* | 2  *If 2 go to col B* | | 3  *If 3 go to next Q* | 1 | | 2 | | | 8 |  | | **FNSE_424G** | Digital cervicography equipment | | 1  *If 1 go to col B* | 2  *If 2 go to col B* | | 3  *If 3 go to next Q* | 1 | | 2 | | | 8 |  | | **FNSE_424H** | Colposcopy equipment | | 1  *If 1 go to col B* | 2  *If 2 go to col B* | | 3  *If 3 go to next Q* | 1 | | 2 | | | 8 |  | | **FNSE_424I** | Materials for providing loop electrosurgical excision  procedure (LEEP) | | 1  *If 1 go to col B* | 2  *If 2 go to col B* | | 3  *If 3 go to next Q* | 1 | | 2 | | | 8 |  | | **FNSE_424J** | Materials for providing cryotherapy/thermal-cold  coagulation | | 1  *If 1 go to col B* | 2  *If 2 go to col B* | | 3  *If 3 go to next Q* | 1 | | 2 | | | 8 |  | | **FNSE_424K** | HPV test (e.g. Cervista test) | | 1  *If 1 go to col B* | 2  *If 2 go to col B* | | 3  *If 3 go to Q.* *425* | 1 | | 2 | | | 8 |  | | **425** | | **FNSE_425** | Does this facility have any guidelines for cervical cancer screening, diagnosis or treatment in this service site today?  *IF YES, ask to see the guidelines.* | | 1. Yes, observed  2. Yes, reported, not seen  3. No | | | | | | | | | |  | | **426** | | **FNSE_426** | Have you or any provider(s) received any training in obtaining cervical specimen procedures or reading HPV tests or visual inspection with acetic acid (VIA) in the past 2 years? | | 1. Yes  2. No | | | | | | | | | |  | | **427** | | **FNSE_427 A/B/C/D/E/F/G** | How many staffs received training on screening and detection of cervical cancer in last two years? | | TOTAL | | | |  | | | | | | In Number | | DOCTOR | | | |  | | | | | | | NURSE | | | |  | | | | | | | SACMO/MA/PARAMEDICS | | | |  | | | | | | | CHCP | | | |  | | | | | | | HA/FWA/SK | | | |  | | | | | | | MHV/SS | | | |  | | | | | |  | |  | |  | **BREAST CANCER** | | | | | | | | | | | |  | | **428** | | **FNSE_428** | Does this facility have any services for screening, diagnosing or treating breast cancer? | | 1. Yes  2. No | | | | | | | | | | If response is No then go to the Q.433 | | **429** | |  | Which of the methods for screening, diagnosing, and/or treating breast cancer are used in this facility: | | **PERFORM IN FACILITY** | | | **REFER FOR TEST** | | | **NOT USED** | | | |  | | **FNSE_429A** | Manual breast examination | | 1 | | | 2 | | | 3 | | | |  | | **FNSE_429B** | Mammography | | 1 | | | 2 | | | 3 | | | |  | | **FNSE_429C** | Fine needle aspiration cytology | | 1 | | | 2 | | | 3 | | | |  | | **FNSE_429D** | Core needle biopsy of lump specimen | | 1 | | | 2 | | | 3 | | | |  | | **FNSE_429E** | Chemotherapy | | 1 | | | 2 | | | 3 | | | |  | | **FNSE_429F** | Radiation therapy | | 1 | | | 2 | | | 3 | | | |  | | **FNSE_429G** | Lumpectomy | | 1 | | | 2 | | | 3 | | | |  | | **FNSE_429H** | Mastectomy | | 1 | | | 2 | | | 3 | | | |  | | **FNSE_429I** | Outpatient maintenance treatment for breast cancer | | 1 | | | 2 | | | 3 | | | |  | |  | |  | **SUPPORT FOR QUALITY SERVICES FOR DIAGNOSING AND TREATING BREAST CANCER** | | | | | | | | | | | |  | | **430** | | **FNSE_430** | Does this facility have any guidelines for breast cancer screening, diagnosis or treatment in this service site today?  *IF YES, ask to see the guidelines* | | 1. Yes, observed  2. Yes, reported, not seen  3. No | | | | | | | | | |  | | **431** | | **FNSE_431** | Have you or any provider(s) received any training in breast cancer screening, diagnosis or treatment in the past 2 years? | | 1. Yes 2. No | | | | | | | | | | If response is No then go to the Q. 433 | | **432** | | **FNSE_432 A/B/C/D/E/F/G** | How many staffs received training on screening and detection of breast cancer in last two years? | | TOTAL | | | |  | | | | | | In Number | | DOCTOR | | | |  | | | | | | | NURSE | | | |  | | | | | | | SACMO/MA/PARAMEDICS | | | |  | | | | | | | CHCP | | | |  | | | | | | | HA/FWA/SK | | | |  | | | | | | | MHV/SS | | | |  | | | | | |  | |  | |  | **COLORECTAL CANCER** | | | | | | | | | | | |  | | 433 | | **FNSE_433** | Does this facility have any services for screening, diagnosing or treating colorectal cancer? | | 1. Yes 2. No | | | | | | | | | | If response is No then go to the Q.438 | | 434 | |  | Which of the following methods for screening for, diagnosing or treating colorectal cancer are used in this facility: | | **PERFORM IN FACILITY** | | | **REFER FOR TEST** | | | **NOT USED** | | | |  | | **FNSE_434A** | Stool guaiac test | | 1 | | | 2 | | | 3 | | | |  | | **FNSE_434B** | Colonoscopy | | 1 | | | 2 | | | 3 | | | |  | | **FNSE_434C** | Biopsy of colon polyp | | 1 | | | 2 | | | 3 | | | |  | | **FNSE_434D** | Surgical interventions | | 1 | | | 2 | | | 3 | | | |  | | **FNSE_434E** | Chemotherapy | | 1 | | | 2 | | | 3 | | | |  | |  | |  | **SUPPORT FOR QUALITY SERVICES FOR DIAGNOSING AND TREATING COLORECTAL CANCER** | | | | | | | | | | | |  | | **435** | | **FNSE_435** | Do you have the national guidelines for colorectal cancer diagnosis and treatment in this service site today?  *If YES ASK: May I see the guideline?* | | 1. Yes, observed  2. Yes, reported, not seen  3. No | | | | | | | | | |  | | **436** | | **FNSE_436** | Have you or any provider(s) received any training in colorectal cancer screening, diagnosis or treatment in the past 2 years? | | 1. Yes 2. No | | | | | | | | | | If response is No then go to the Q. 438 | | **437** | | **FNSE_437 A/B/C/D/E/F/G** | How many staffs received training on screening and detection of colorectal cancer in last two years? | | TOTAL | | | |  | | | | | | In Number | | DOCTOR | | | |  | | | | | | | NURSE | | | |  | | | | | | | SACMO/MA/PARAMEDICS | | | |  | | | | | | | CHCP | | | |  | | | | | | | HA/FWA/SK | | | |  | | | | | | | MHV/SS | | | |  | | | | | |  | |  | |  | **PROSTATE CANCER** | | | | | | | | | | | |  | | **438** | | **FNSE_438** | Does this facility screen for, diagnose or treat prostate cancer? | | 1. Yes 2. No | | | | | | | | | | If response is No then go to the Q.440 | | **439** | |  | Which of the following methods for diagnosing and/or treating prostate cancer are used in this facility: | | **PERFORM IN FACILITY** | | | **REFER FOR TEST** | | | **NOT USED** | | | |  | | **FNSE_439A** | Digital rectal examination (DRE) | | 1 | | | 2 | | | 3 | | | |  | | **FNSE_439B** | Prostate specific antigen (PSA) testing | | 1 | | | 2 | | | 3 | | | |  | | **FNSE_439C** | Prostate biopsy | | 1 | | | 2 | | | 3 | | | |  | | **FNSE_439D** | Surgical interventions | | 1 | | | 2 | | | 3 | | | |  | | **FNSE_439E** | Radiation therapy | | 1 | | | 2 | | | 3 | | | |  | |  | |  | **SUPPORT FOR QUALITY SERVICES FOR DIAGNOSING AND TREATING PROSTATE CANCER** | | | | | | | | | | | |  | | **440** | | **FNSE_440** | Do you have the national guidelines for prostate cancer diagnosis and treatment in this service site today?  IF YES ASK: May I see the guidelines? | | 1. Yes, observed  2. Yes, reported, not seen  3. No | | | | | | | | | |  | | **441** | | **FNSE_441** | Have you or any provider(s) received any training in prostate cancer screening, diagnosis or treatment in the past 2 years? | | 1. Yes  2. No | | | | | | | | | |  | | **442** | | **FNSE_442 A/B/C/D/E/F/G** | How many staffs received training on screening and detection of prostate cancer in last two years? | | TOTAL | | | |  | | | | | | In Number | | DOCTOR | | | |  | | | | | | | NURSE | | | |  | | | | | | | SACMO/MA/PARAMEDICS | | | |  | | | | | | | CHCP | | | |  | | | | | | | HA/FWA/SK | | | |  | | | | | | | MHV/SS | | | |  | | | | | |  | |  | |  | **Mental Health Services** | | | | | | | | | | | |  | | **443** | | **FNSE_443** | Does this facility offer any services for mental conditions such as depression or dementia? | | 1. Yes 2. No | | | | | | | | | | If response is No then go to the Q.451 | | **444** | |  | For each service I ask about, please tell me if the service is offered in this facility. If yes, is it offered as an inpatient, an outpatient or both as an in- and outpatient service? | | **Yes offered** | | | | | | | **Not offered** | | |  | | **Inpatient**  **only** | | **Outpatient only** | | | **Both in- and outpatient** | | | **FNSE_444A** | Mental disorders (depression, psychosis and bipolar disorder) | | 1 | | 2 | | | 3 | | 4 | | |  | | **FNSE_444B** | Mental health inpatient services | | 1 | |  | | |  | | 4 | | |  | | **445** | |  | Now I would like to know about specific types of mental and neurological services offered. For each diagnosis I mention, please tell me if this facility diagnoses and/or provides patient follow-up for the condition. | | **Diagnoses only** | | **Provides patient follow-up only** | | | **Diagnoses and provides patient follow-up** | | | **No Service** | |  | | **FNSE_445A** | Psychosis | |  | |  | | |  | | |  | |  | | **FNSE_445B** | Depression | |  | |  | | |  | | |  | |  | | **FNSE_445C** | Bipolar disorder | |  | |  | | |  | | |  | |  | | **FNSE_445D** | Dementia | |  | |  | | |  | | |  | |  | | **446** | | **FNSE_446** | Does this facility have any guideline on screening and referral for mental health disorders | | 1. Yes 2. No | | | | | | | | | |  | | **447** | | **FNSE_447** | Does this facility have any links with community services for mental health services? | | 1. Yes 2. No | | | | | | | | | |  | | **448** | | **FNSE_448** | Does this facility have the mental health guidelines for diagnosis and management of mental conditions?  IF YES, ASK: May I see the guidelines? | | 1. Yes, observed  2. Yes, reported, not seen  3. No | | | | | | | | | |  | | **449** | | **FNSE_449** | Have you or any provider(s) of mental health services received training related to diagnosis, counselling or treatment for mental health in the past 2 years? | | 1. Yes 2. No | | | | | | | | | | If response is No then go to the Q.451 | | **450** | | **FNSE_450 A/B/C/D/E/F/G** | How many staffs received training related to diagnosis, counselling or treatment for mental health in last two years? | | TOTAL | | | | |  | | | | |  | | DOCTOR | | | | |  | | | | | | NURSE | | | | |  | | | | | | SACMO/MA/PARAMEDICS | | | | |  | | | | | | CHCP | | | | |  | | | | | | HA/FWA/SK | | | | |  | | | | | | MHV/SS | | | | |  | | | | |  | |  | |  | **MINOR SURGERY** | | | | | | | | | | | |  | | **451** | | **FNSE_451** | Does this facility offer any minor surgical services either for out- or inpatients (such as suturing, closed repair of fracture, wound debridement, etc.)? | | 1. Yes 2. No | | | | | | | | | | If response is No then go to the Q.453 | | **452** | |  | Please tell me if this facility provides the following services: | | **YES** | | | | | | | **NO SEVICE** | | |  | | **OUTPATIENT ONLY** | | **INPATIENT**  **ONLY** | | **BOTH OUT- AND**  **INPATIENT** | | | | **FNSE_452A** | Wound debridement | | 1 | | 2 | | 3 | | | 4 | | |  | | **FNSE_452B** | Acute burn management | | 1 | | 2 | | 3 | | | 4 | | |  | | **FNSE_452C** | Suturing | | 1 | | 2 | | 3 | | | 4 | | |  | | **FNSE_452D** | Closed repair of fracture | | 1 | | 2 | | 3 | | | 4 | | |  | | **FNSE_452E** | Closed reduction of dislocated joint | | 1 | | 2 | | 3 | | | 4 | | |  | | **FNSE_452F** | Chest tube insertion | | 1 | | 2 | | 3 | | | 4 | | |  | | **FNSE_452G** | Biopsy of lymph node or mass | | 1 | | 2 | | 3 | | | 4 | | |  | | **FNSE_452H** | Removal of foreign body (throat, eye, ear of nose) | | 1 | | 2 | | 3 | | | 4 | | |  | |  |  | | **ADDITIONAL NCD SERVICES** | | | | | | | | | | | |  | | **453** |  | | DOES YOUR FACILITY OFFER THE FOLLOWING CLINICAL NCD SERVICES RELATED TO NCDS? | | **YES** | | | | **NO** | | | | | |  | | **FNSE_453A** | | Referral for coronary heart diseases | | 1 | | | | 2 | | | | | |  | | **FNSE_453B** | | Referral for stroke | | 1 | | | | 2 | | | | | |  | | **FNSE_453C** | | Measurement of waist circumference | | 1 | | | | 2 | | | | | |  | | **FNSE_453D** | | BMI categorization for NCD risk management | | 1 | | | | 2 | | | | | |  | | **FNSE_453E** | | Waist circumference categorization for NCD risk management | | 1 | | | | 2 | | | | | |  | | **FNSE_453F** | | Waist-hip ratio categorization for cardio-vascular risk management | | 1 | | | | 2 | | | | | |  | | **FNSE_453G** | | CVD risk categorization using non-laboratory chart | | 1 | | | | 2 | | | | | |  | | **FNSE_453H** | | CVD risk categorization using laboratory chart | | 1 | | | | 2 | | | | | |  | | **FNSE_453I** | | Screening for retinal health | | 1 | | | | 2 | | | | | |  | | **FNSE_453J** | | Clinical management of gestational diabetes | | 1 | | | | 2 | | | | | |  | | **FNSE_453K** | | Referral for gestational diabetes | | 1 | | | | 2 | | | | | |  | |  |  | | **LIFESTYLE MODIFICATION SERVICES** | | | | | | | | | | | |  | | **454** |  | | WHAT LIFESTYLE MODIFICATION SERVICES/PROGRAMS DOES YOUR FACILITY OFFER? | | **YES** | | | | **NO** | | | | | |  | | **FNSE_454A** | | Counseling for cessation of smoking | | 1 | | | | 2 | | | | | |  | | **FNSE_454B** | | Counseling for cessation of smokeless tobacco products | | 1 | | | | 2 | | | | | |  | | **FNSE_454C** | | Use of 5A-5R approach for smoking cessation | | 1 | | | | 2 | | | | | |  | | **FNSE_454D** | | Use of 5A-5R approach for smokeless tobacco cessation | | 1 | | | | 2 | | | | | |  | | **FNSE_454E** | | Counseling for healthy and balanced diet | | 1 | | | | 2 | | | | | |  | | **FNSE_454F** | | Counseling for reduction of salt intake | | 1 | | | | 2 | | | | | |  | | **FNSE_454G** | | Counseling for reduction of sugar intake | | 1 | | | | 2 | | | | | |  | | **FNSE_454H** | | Counseling for reduction of fat or trans-fat intake | | 1 | | | | 2 | | | | | |  | | **FNSE_454I** | | Counseling for increasing fruits consumption | | 1 | | | | 2 | | | | | |  | | **FNSE_454J** | | Counseling for increasing vegetables consumption | | 1 | | | | 2 | | | | | |  | | **FNSE_454K** | | Use of 5A-5R approach for healthy diet | | 1 | | | | 2 | | | | | |  | | **FNSE_454L** | | Counseling for cessation or reduction of alcohol consumption | | 1 | | | | 2 | | | | | |  | | **FNSE_454M** | | Use of 5A-5R approach for reduction or cessation of alcohol consumption | | 1 | | | | 2 | | | | | |  | | **FNSE_454N** | | Counseling for adequate physical activity | | 1 | | | | 2 | | | | | |  | | **FNSE_454O** | | Use of 5A-5R approach for adequate physical activity | | 1 | | | | 2 | | | | | |  | | **FNSE_454P** | | Counseling for weight management | | 1 | | | | 2 | | | | | |  | | **FNSE_454Q** | | Counseling on reduction of household air pollution | | 1 | | | | 2 | | | | | |  | | **FNSE_454R** | | Use of 5A-5R approach for the reduction of household air pollution | | 1 | | | | 2 | | | | | |  | | **FNSE_454S** | | Counseling on self-care for diabetes | | 1 | | | | 2 | | | | | |  | | **FNSE_454T** | | Counseling on self-care for cardiovascular diseases | | 1 | | | | 2 | | | | | |  | | **FNSE_454U** | | Demonstration of the use of inhalers | | 1 | | | | 2 | | | | | |  | | **FNSE_454V** | | Counseling on self-care for Asthma | | 1 | | | | 2 | | | | | |  | | **FNSE_454W** | | Counseling on self-care for COPD | | 1 | | | | 2 | | | | | |  | | **FNSE_454X** | | Counseling on medication dosages, frequency, and timing | | 1 | | | | 2 | | | | | |  | | **FNSE_454Y** | | Counseling on adherence to medications | | 1 | | | | 2 | | | | | |  | | **FNSE_454Z** | | Flow charts with referral criteria | | 1 | | | | 2 | | | | | |  | | **FNSE_454AA** | | Patient clinical record | | 1 | | | | 2 | | | | | |  | | **FNSE_454AB** | | Medical information register | | 1 | | | | 2 | | | | | |  | | **455** | **FNSE_455** | | Have you or any provider(s) received any training on counseling in the past 2 years? | | 1. Yes 2. No | | | | | | | | | |  | | **456** | **FNSE_456A/B/C/D/E/F/G** | | How many staff received training on counseling in last two years? | | TOTAL | | | |  | | | | | |  | | DOCTOR | | | |  | | | | | | | NURSE | | | |  | | | | | | | SACMO/MA/PARAMEDICS | | | |  | | | | | | | CHCP | | | |  | | | | | | | HA/FWA/SK | | | |  | | | | | | | MHV/SS | | | |  | | | | | | | **457** | **FNSE_457A/B/C/D/E/F/G** | | How many staff received training on Counseling for NCD in last two years? | | TOTAL | | | |  | | | | | |  | | DOCTOR | | | |  | | | | | | | NURSE | | | |  | | | | | | | SACMO/MA/PARAMEDICS | | | |  | | | | | | | CHCP | | | |  | | | | | | | HA/FWA/SK | | | |  | | | | | | | MHV/SS | | | |  | | | | | | | **458** | **FNSE_458A/B/C/D/E/F/G** | | How many staff received training on infection prevention in last two years? | | TOTAL | | | |  | | | | | |  | | DOCTOR | | | |  | | | | | | | NURSE | | | |  | | | | | | | SACMO/MA/PARAMEDICS | | | |  | | | | | | | CHCP | | | |  | | | | | | | HA/FWA/SK | | | |  | | | | | | | MHV/SS | | | |  | | | | | | | **459** | **FNSE_459A/B/C/D/E/F/G** | | How many staff received training on use of digital technology in last two years? | | TOTAL | | | |  | | | | | |  | | DOCTOR | | | |  | | | | | | | NURSE | | | |  | | | | | | | SACMO/MA/PARAMEDICS | | | |  | | | | | | | CHCP | | | |  | | | | | | | HA/FWA/SK | | | |  | | | | | | | MHV/SS | | | |  | | | | | | |  |  | | **NCD RELATED COMMUNICATION MATERIALS** | | | | | | | | | | | |  | |  |  | | WHAT NCD RELATED COMMUNICATION MATERIALS (E.G.: FLIP CHART, POSTERS, LEAFLETS, VIDEO CLIPS, AUDIO CLIPS) DOES YOUR FACILITY HAVE? | | | | | | | | | | | |  | | **460** | **FNSE_460A** | | On smoking cessation | | 1. Yes  2. No | | | | | | | | | | If No go to Q.461 | | **FNSE_460B** | | On smoking cessation what type of communication material present? | | 1. Flip Chart  2. Poster  3. leaflet  4. Audio Clip  5. Video Clip  6. Others ______________ | | | | | | | | | |  | | **461** | **FNSE_461A** | | On cessation of smokeless tobacco consumption | | 1. Yes  2. No | | | | | | | | | | If No go to Q.462 | | **FNSE_461B** | | On smokeless tobacco consumption what type of communication material present? | | 1. Flip Chart  2. Poster  3. leaflet  4. Audio Clip  5. Video Clip  6. Others ______________ | | | | | | | | | |  | | **462** | **FNSE_462A** | | On reduction of harmful use of alcohol | | 1. Yes  2. No | | | | | | | | | | If No go to Q.463 | | **FNSE_462B** | | On reduction of harmful use of alcohol what type of communication material present? | | 1. Flip Chart  2. Poster  3. leaflet  4. Audio Clip  5. Video Clip  6. Others ______________ | | | | | | | | | |  | | **463** | **FNSE_463A** | | On salt reduction | | 1. Yes  2. No | | | | | | | | | | If No go to Q.464 | | **FNSE_463B** | | On salt reduction what type of communication material present? | | 1. Flip Chart  2. Poster  3. leaflet  4. Audio Clip  5. Video Clip  6. Others ______________ | | | | | | | | | |  | | **464** | **FNSE_464A** | | Counseling for Sugar reduction | | 1. Yes  2. No | | | | | | | | | | If No go to Q.465 | | **FNSE_464B** | | For Sugar consumption reduction what type of communication material present? | | 1. Flip Chart  2. Poster  3. leaflet  4. Audio Clip  5. Video Clip  6. Others ______________ | | | | | | | | | |  | | **465** | **FNSE_465A** | | Counseling for oil and fat reduction | | 1. Yes  2. No | | | | | | | | | | If No go to Q.466 | | **FNSE_465B** | | For oil and fat consumption reduction what type of communication material present? | | 1. Flip Chart  2. Poster  3. leaflet  4. Audio Clip  5. Video Clip  6. Others ______________ | | | | | | | | | |  | | **466** | **FNSE_466A** | | On physical activity | | 1. Yes  2. No | | | | | | | | | | If No go to Q.467 | | **FNSE_466B** | | On physical activity what type of communication material present? | | 1. Flip Chart  2. Poster  3. leaflet  4. Audio Clip  5. Video Clip  6. Others ______________ | | | | | | | | | |  | | **467** | **FNSE_467A** | | On increasing fruits and vegetable consumption | | 1. Yes  2. No | | | | | | | | | | If No go to Q.501 | | **FNSE_467B** | | On increasing fruits and vegetable consumption what type of communication material present? | | 1. Flip Chart  2. Poster  3. leaflet  4. Audio Clip  5. Video Clip  6. Others ______________ | | | | | | | | | |  | | | | | | | | | | |
| **Section-5: Laboratory/Daignostic services** | | | | | | | | | |
| **501** | | **FLG_501A** | | Random blood glucose | | 1. Yes  2. No |  | | |
| **FLG_501B** | | Fasting blood glucose | | 1. Yes  2. No |  | | |
| **FLG_501C** | | Oral Glucose tolerance test (OGTT) | | 1. Yes  2. No |  | | |
| **FLG_501D** | | HbA1C | | 1. Yes  2. No |  | | |
| **FLG_501E** | | Urine protein test | | 1. Yes  2. No |  | | |
| **FLG_501F** | | Urine ketones test | | 1. Yes  2. No |  | | |
| **FLG_501G** | | Troponin I | | 1. Yes  2. No |  | | |
| **FLG_501H** | | Urine glucose test | | 1. Yes  2. No |  | | |
| **FLG_501I** | | Renal function tests | | 1. Yes  2. No |  | | |
| **FLG_501J** | | Full blood count | | 1. Yes  2. No |  | | |
| **FLG_501K** | | Liver function tests | | 1. Yes  2. No |  | | |
| **FLG_501L** | | Serum creatinine | | 1. Yes  2. No |  | | |
| **FLG_501M** | | Serum Electrolyte | | 1. Yes  2. No |  | | |
| **FLG_501N** | | Total cholesterol | | 1. Yes  2. No |  | | |
| **FLG_501O** | | Lipid profile | | 1. Yes  2. No |  | | |
| **FLG_501P** | | Pregnancy test | | 1. Yes  2. No |  | | |
| **IMAGING DIAGNOSTICS AND OTHER PROCEDURES** | | | | |  | | |
| **FLG_501Q** | | Ultrasound | | 1. Yes  2. No |  | | |
| **FLG_501R** | | X-ray | | 1. Yes  2. No |  | | |
| **FLG_501S** | | Computed tomography (CT) scan | | 1. Yes  2. No |  | | |
| **FLG_501T** | | Retinal imaging/ Fundoscopy | | 1. Yes  2. No |  | | |
| **FLG_501U** | | Electrocardiogram (ECG) | | 1. Yes  2. No |  | | |
| **FLG_501V** | | Visual inspection with acetic acid | | 1. Yes  2. No |  | | |
| **FLG_501W** | | Spirometry | | 1. Yes  2. No |  | | |

|  |  | **SECTION-6: PHARMACEUTICAL COMMODITY AVAILABILITY** | |  |
| --- | --- | --- | --- | --- |
| **601** | **FPC_601** | Does this facility stock any medicines, vaccines or contraceptive commodities? | 1. Yes  2. No | If response is No then go to the Q.801 |

|  |  | I would like to know if the following medicines are available today in this facility. I would also like to observe the medicines that are available. If any of the medicines I mention is stored in another location in the facility please tell me where in the facility it is stored so I can go there to verify. I will also be asking about stock outs for some specific medicines. | **(A) AVAILABILITY** | | | | |  |
| --- | --- | --- | --- | --- | --- | --- | --- | --- |
| **OBSERVED AVAILABLE** | | **NOT OBSERVED** | | |
| **AT LEAST ONE NOT EXPIRED** | **AVAILABLE BUT EXPIRED** | **REPORTED AVAILABLE BUT NOT SEEN** | **USUALLY AVAILABLE BUT NOT TODAY** | **NEVER AVAILABLE** |
| **602** |  | **RESPIRATORY** | | | | | |  |
| **FPC_602A** | Beclomethasone inhaler | 1 | 2 | 3 | 4 | 5 |  |
| **FPC_602B** | Beclomethasone tablet | 1 | 2 | 3 | 4 | 5 |  |
| **FPC_602C** | Salbutamol inhaler | 1 | 2 | 3 | 4 | 5 |  |
| **FPC_602D** | Salbutamol + Ipratropium bromide inhaler | 1 | 2 | 3 | 4 | 5 |  |
| **FPC_602E** | Salbutamol nebulizer solution | 1 | 2 | 3 | 4 | 5 |  |
| **FPC_602F** | Salbutamol + Ipratropium bromide nebulizer solution | 1 | 2 | 3 | 4 | 5 |  |
| **FPC_602G** | Budesonide inhaler + Formoterol | 1 | 2 | 3 | 4 | 5 |  |
| **FPC_602H** | Aminophylline. e.g. Filin | 1 | 2 | 3 | 4 | 5 |  |
| **PC602I** | Theophylline. e.g. Contine | 1 | 2 | 3 | 4 | 5 |  |
| **FPC_602J** | Montelukast. e.g. Monas | 1 | 2 | 3 | 4 | 5 |  |
| **FPC_602K** | Ipratropium bromide | 1 | 2 | 3 | 4 | 5 |  |
| **FPC_602L** | Hydrocortisone injection | 1 | 2 | 3 | 4 | 5 |  |
| **FPC_602M** | Prednisolone | 1 | 2 | 3 | 4 | 5 |  |
| **FPC_602N** | Levofloxacin | 1 | 2 | 3 | 4 | 5 |  |
| **FPC_602O** | Cefuroxime | 1 | 2 | 3 | 4 | 5 |  |
| **FPC_602P** | Amoxicillin | 1 | 2 | 3 | 4 | 5 |  |
| **FPC_602Q** | Pneumococcal vaccine | 1 | 2 | 3 | 4 | 5 |  |
| **603** |  | **CARDIOVASCULAR** | | | | | |  |
| **FPC_603A** | Calcium channel blocker  (e.g. amlodipine tablet) (oral) | 1 | 2 | 3 | 4 | 5 |  |
| **FPC_603B** | Beta blocker (e.g. bisoprolol, metoprolol, carvedilol tablet) (oral) | 1 | 2 | 3 | 4 | 5 |  |
| **FPC_603C** | ACE inhibitor (e.g. enalapril tablet) (oral) | 1 | 2 | 3 | 4 | 5 |  |
| **FPC_603D** | Angiotensin receptor blocker (e.g. Losartan potassium, Olmesartan) | 1 | 2 | 3 | 4 | 5 |  |
| **FPC_603E** | Digoxin injection | 1 | 2 | 3 | 4 | 5 |  |
| **FPC_603F** | Glyceryl trinitrate sublingual tablet | 1 | 2 | 3 | 4 | 5 |  |
| **FPC_603G** | Thiazide/thiazide-type diuretic (e.g. hydrochlorothiazide, chlorthalidone, indapamide tablet) (oral) | 1 | 2 | 3 | 4 | 5 |  |
| **FPC_603H** | Isosorbide dinitrate (capsule/tablet) | 1 | 2 | 3 | 4 | 5 |  |
| **FPC_603I** | Statin (e.g. simvastatin tablet) (oral) | 1 | 2 | 3 | 4 | 5 |  |
| **FPC_603J** | Warfarin (capsule/tablet) | 1 | 2 | 3 | 4 | 5 |  |
| **FPC_603K** | Aspirin. e.g. Ecosprin | 1 | 2 | 3 | 4 | 5 |  |
| **FPC_603L** | Furosemide | 1 | 2 | 3 | 4 | 5 |  |
| **FPC_603M** | Spironolactone, e.g: Spirocard | 1 | 2 | 3 | 4 | 5 |  |
| **FPC_603N** | Clopidogrel. e.g. Clopid | 1 | 2 | 3 | 4 | 5 |  |
| **604** |  | **DIABETES** | | | | | |  |
| **FPC_604A** | Metformin (capsule/tablet) | 1 | 2 | 3 | 4 | 5 |  |
| **FPC_604B** | Glibenclamide tablet | 1 | 2 | 3 | 4 | 5 |  |
| **FPC_604C** | Insulin injection (regular) | 1 | 2 | 3 | 4 | 5 |  |
| **FPC_604D** | Insulin injection (other than regular) | 1 | 2 | 3 | 4 | 5 |  |
| **FPC_604E** | Gliclazide tablet or other sulfonylurea (e.g. glipizide) (oral) | 1 | 2 | 3 | 4 | 5 |  |
| **FPC_604F** | Glucose 50% injection | 1 | 2 | 3 | 4 | 5 |  |
|  |  | **MENTAL HEALTH** | | | | | |  |
| **605** | **FPC_605A** | Amitriptyline tablet | 1 | 2 | 3 | 4 | 5 |  |
| **FPC_605B** | Benzodiazepine tablet | 1 | 2 | 3 | 4 | 5 |  |
| **FPC_605C** | Carbamazepine tablet | 1 | 2 | 3 | 4 | 5 |  |
| **FPC_605D** | Chlorpromazine injection | 1 | 2 | 3 | 4 | 5 |  |
| **FPC_605E** | Clozapine tablet | 1 | 2 | 3 | 4 | 5 |  |
| **FPC_605F** | Clomipramine capsule | 1 | 2 | 3 | 4 | 5 |  |
| **FPC_605G** | Fluoxetine capsule | 1 | 2 | 3 | 4 | 5 |  |
| **FPC_605H** | Fluphenazine injection | 1 | 2 | 3 | 4 | 5 |  |
| **FPC_605I** | Haloperidol injection | 1 | 2 | 3 | 4 | 5 |  |
| **FPC_605J** | Haloperidol tablet | 1 | 2 | 3 | 4 | 5 |  |
| **FPC_605K** | Lithium carbonate tablet | 1 | 2 | 3 | 4 | 5 |  |
| **FPC_605L** | Risperidone tablet | 1 | 2 | 3 | 4 | 5 |  |
| **FPC_605M** | Sodium valproate tablet | 1 | 2 | 3 | 4 | 5 |  |
| **606** |  | **OTHER/GENERAL MEDICINES** | | | | | |  |
| **FPC_606A** | Acetaminophen (paracetamol) (capsule/tablet) | 1 | 2 | 3 | 4 | 5 |  |
| **FPC_606B** | Paracetamol syrup/suspension | 1 | 2 | 3 | 4 | 5 |  |
| **FPC_606C** | Acetylsalicylic acid (aspirin) (oral) | 1 | 2 | 3 | 4 | 5 |  |
| **FPC_606D** | Adrenaline or epinephrine injection | 1 | 2 | 3 | 4 | 5 |  |
| **FPC_606E** | Atropine injection | 1 | 2 | 3 | 4 | 5 |  |
| **FPC_606F** | Betamethasone injection | 1 | 2 | 3 | 4 | 5 |  |
| **FPC_606G** | Buprenorphine (Buprenex) narcotic analgaesic (oral) | 1 | 2 | 3 | 4 | 5 |  |
| **FPC_606H** | Calcium gluconate injection | 1 | 2 | 3 | 4 | 5 |  |
| **FPC_606I** | Calcium chloride injection | 1 | 2 | 3 | 4 | 5 |  |
| **FPC_606J** | Diazepam suppository/gel | 1 | 2 | 3 | 4 | 5 |  |
| **FPC_606K** | Diazepam (capsule/tablet) | 1 | 2 | 3 | 4 | 5 |  |
| **FPC_606L** | Paracetamol tablet, e.g: Ace, Napa | 1 | 2 | 3 | 4 | 5 |  |
| **FPC_606M** | Ibuprofen, e.g: Bufen | 1 | 2 | 3 | 4 | 5 |  |
| **FPC_606N** | Codeine | 1 | 2 | 3 | 4 | 5 |  |
| **FPC_606O** | Morphine | 1 | 2 | 3 | 4 | 5 |  |
| **FPC_606P** | Penicillin, e.g: Benzylpenicillin, Penvik etc | 1 | 2 | 3 | 4 | 5 |  |
| **FPC_606Q** | Erythromycin | 1 | 2 | 3 | 4 | 5 |  |
| **FPC_606R** | Epinephrine, e.g: Adrin | 1 | 2 | 3 | 4 | 5 |  |
| **FPC_606S** | Heparin e.g: Heparon | 1 | 2 | 3 | 4 | 5 |  |
| **FPC_606T** | Enoxaparin, e.g: Alexa, Cardinex | 1 | 2 | 3 | 4 | 5 |  |
| **FPC_606U** | Magnesium sulphate e.g: Magsulf | 1 | 2 | 3 | 4 | 5 |  |
| **FPC_606V** | Promethazine, e.g: Otosil, Histaphen | 1 | 2 | 3 | 4 | 5 |  |
| **FPC_606W** | Dextrose/ Glucose infusion e.g: (DA, DNS) | 1 | 2 | 3 | 4 | 5 |  |
| **FPC_606X** | Sodium chloride infusion (Normal saline) | 1 | 2 | 3 | 4 | 5 |  |
| **FPC_606Y** | Oxygen | 1 | 2 | 3 | 4 | 5 |  |
| **Section-7: Other Equipment** | | | | | | | | |

| **701** |  | Please tell me if the following basic equipment and supplies used in the provision of client services are available anywhere in the outpatient service area and are functional: | **(A) AVAILABLE** | | | **(B) FUNCTIONING** | | |  |
| --- | --- | --- | --- | --- | --- | --- | --- | --- | --- |
| **OBSERVED** | **REPORTED, NOT SEEN** | **NO** | **YES** | **NO** | **DON’T**  **KNOW** |  |
| **FNE_701A** | Adult weighing scale | 1  *If 1 go to col B* | 2  *If 2 go to col B* | 3  *If 3 go to next Q* | 1 | 2 | 8 |  |
| **FNE_701B** | Blood pressure apparatus (may be digital or manual sphygmomanometer with stethoscope) | 1  *If 1 go to col B* | 2  *If 2 go to col B* | 3  *If 3 go to next Q* | 1 | 2 | 8 |  |
| **FNE_701C** | Thermometer | 1  *If 1 go to col B* | 2  *If 2 go to col B* | 3  *If 3 go to next Q* | 1 | 2 | 8 |  |
| **FNE_701D** | Stethoscope | 1  *If 1 go to col B* | 2  *If 2 go to col B* | 3  *If 3 go to next Q* | 1 | 2 | 8 |  |
| **FNE_701E** | Examination light that can be aimed for client examination  (flashlight acceptable) | 1  *If 1 go to col B* | 2  *If 2 go to col B* | 3  *If 3 go to next Q* | 1 | 2 | 8 |  |
| **FNE_701F** | Height board/stadiometer | 1  *If 1 go to col B* | 2  *If 2 go to col B* | 3  *If 3 go to next Q* | 1 | 2 | 8 |  |
| **FNE_701G** | Facility provided device for measuring 1 minute (for counting respirations) | 1  *If 1 go to col B* | 2  *If 2 go to col B* | 3  *If 3 go to next Q* | 1 | 2 | 8 |  |
| **FNE_701H** | Pulse oximeter | 1  *If 1 go to col B* | 2  *If 2 go to col B* | 3  *If 3 go to next Q* | 1 | 2 | 8 |  |
| **FNE_701I** | Measuring tape | 1 | 2 | 3  *If 3 go to next Q* |  |  |  |  |
| **FNE_701J** | Ophthalmoscope | 1  *If 1 go to col B* | 2  *If 2 go to col B* | 3  *If 3 go to next Q* | 1 | 2 | 8 |  |
| **FNE_701K** | Pen light/flashlight (to see back of throat) | 1  *If 1 go to col B* | 2  *If 2 go to col B* | 3  *If 3 go to next Q* | 1 | 2 | 8 |  |
| **FNE_701L** | Tongue depressors | 1 | 2 | 3 |  |  |  |  |
| **FNE_701M** | Tuning fork | 1  *If 1 go to col B* | 2  *If 2 go to col B* | 3  *If 3 go to next Q* | 1 | 2 | 8 |  |
| **FNE_701N** | Glucometer | 1  *If 1 go to col B* | 2  *If 2 go to col B* | 3  *If 3 go to next Q* | 1 | 2 | 8 |  |
| **FNE_701O** | Blood glucose test strips | 1  *If 1 go to col B* | 2  *If 2 go to col B* | 3  *If 3 go to next Q* | 1 | 2 | 8 |  |
| **FNE_701P** | Urine protein test strips | 1  *If 1 go to col B* | 2  *If 2 go to col B* | 3  *If 3 go to next Q* | 1 | 2 | 8 |  |
| **FNE_701Q** | Urine ketones test strips | 1  *If 1 go to col B* | 2  *If 2 go to col B* | 3  *If 3 go to next Q* | 1 | 2 | 8 |  |
| **FNE_701R** | Blood cholesterol assay | 1  *If 1 go to col B* | 2  *If 2 go to col B* | 3  *If 3 go to next Q* | 1 | 2 | 8 |  |
| **FNE_701S** | Lipid profile assay | 1  *If 1 go to col B* | 2  *If 2 go to col B* | 3  *If 3 go to next Q* | 1 | 2 | 8 |  |
| **FNE_701T** | Serum creatinine assay | 1  *If 1 go to col B* | 2  *If 2 go to col B* | 3  *If 3 go to next Q* | 1 | 2 | 8 |  |
| **FNE_701U** | Troponin test strips | 1  *If 1 go to col B* | 2  *If 2 go to col B* | 3  *If 3 go to next Q* | 1 | 2 | 8 |  |
| **FNE_701V** | Urine microalbuminuria test strips | 1  *If 1 go to col B* | 2  *If 2 go to col B* | 3  *If 3 go to next Q* | 1 | 2 | 8 |  |
| **FNE_701W** | Equipment for serum electrolyte | 1  *If 1 go to col B* | 2  *If 2 go to col B* | 3  *If 3 go to next Q* | 1 | 2 | 8 |  |
| **FNE_701X** | Pregnancy test strip | 1  *If 1 go to col B* | 2  *If 2 go to col B* | 3  *If 3 go to next Q* | 1 | 2 | 8 |  |
| **FNE_701Y** | Equipment for VIA | 1  *If 1 go to col B* | 2  *If 2 go to col B* | 3  *If 3 go to Q.801* | 1 | 2 | 8 |  |

**Section 8: Reporting and supervision**

| **Number** | **Variable number** | **Question** | **Answer** | **Instruction** |
| --- | --- | --- | --- | --- |
| **801** | **FRS_801** | Is there a register or database for patients who are diagnosed with NCDs where information such as when patients start treatment, compliance and outcomes are recorded?  *If YES, ask to see the register.* | 1. Yes, start and outcomes/compliance information recorded  2. Yes, start recorded  3. No |  |
| **802** | **FRS_802** | Does the facility have an appointment system for routine follow-up for patients diagnosed with NCDs?  *IF YES, ask to see an appointment schedule for any NCD.* | 1. Yes, schedule observed  2. Yes, reported, no schedule seen  3. No |  |
| **803** | **FRS_803** | Are individual patient treatment cards/files maintained for patients with chronic diseases?  *IF YES, ask to see a patient treatment card.* | 1. Yes, observed  2. Yes, reported, not seen  3. No |  |
| **804** | **FRS_804** | What is the format that your facility uses for reporting? | 1. Paper Based  2. Electronic  3. Both | Any one |
| **805** | **FRS_805** | Does your facility have any NCD indicators in the reporting system? | 1. Yes  2. No |  |
| **806** | **FRS_806** | Do your facility receive any feedback from the national MIS based on the reporting? | 1. Yes  2. No | If no go to FRS_808 |
| **807** | **FRS_807** | What type of feed-back do you receive? | 1. On Staffing  2. On drugs and supplies  3. On quality of reporting | Answer can be multiple |
| **808** | **FRS_808** | How frequently do you have staff meeting? | 1. weekly  2. Bi-weekly  3. monthly  4. others ______________ | Any one |
| **809** | **FRS_809** | Do you discuss the reports in any of the staff meetings? | 1. Yes  2. No | If No go to FRS_811 |
| **810** | **FRS_810** | What are broad areas of decision making based on the reports? | 1. On Staffing  2. On drugs and supplies  3. On quality of reporting | Answer can be multiple |
| **811** | **FRS_811** | When was the last time this facility received a supervision visit from the higher level? | 1. within last 01 year  2. Not in last 01 year | Any one |
| **812** | **FRS_812** | **During the supervision visit, did the supervisor assess any of the following?** | | Any one |
| FRS_812a Staffing (e.g. staff available and training) | 1. Yes  2. No |
| FRS_812b Data (e.g. completeness, quality, and timely reporting) | 1. Yes  2. No |
| FRS_812c Pharmacy (e.g. drug stock out, expiry, records, etc.) | 1. Yes  2. No |

| **Is there any incomplete information that need to address?** | 1. Yes  2. No | Collect information from the facility manager. In her/his absence approach the next knowledgeable person. |
| --- | --- | --- |
| **FBI_122. Name** | **FBI_123. Post** | |
| **1.** |  | |
| **2.** |  | |
| **3.** |  | |

Survey end. Thank you for your time.

**Geolocation (in decimal degrees)**

| **117** | FBI_117a | GIS: Height from ground |  |
| --- | --- | --- | --- |
| FBI_117b | GIS: Latitude (x.y0) |  |
| FBI_117c | GIS: Longitude (x.y0) |  |

**Section 9: Interview end time**

| **901** | **FEND_901** | End time of the interview | _____:_____ | 24hr Format |
| --- | --- | --- | --- | --- |

| Please write comment if any: |
| --- |

**Overall comments.**
